# Supplementary material
Source: publisher site journal article supplement (https://www.dovepress.com/article/127645)
Supplement: Supplementary file 1 [file get_supplementary_file.php]

# S1. Questionnaire results on adherence in asthma control for trained and untrained participants

| Variable                                                                                     | Total<br>(n=360) | Untrained<br>(n=180) | Trained<br>(n=180) | p value |
|----------------------------------------------------------------------------------------------|------------------|----------------------|--------------------|---------|
| Importance of treatment adherence compared to the other characteristics of asthma management |                  |                      |                    |         |
| Most important, yes                                                                          | 334 (92.8%)      | 162 (90.0%)          | 172 (95.6%)        | 0.1219  |
| Importance attached to the characteristics of asthma management (most important)             |                  |                      |                    |         |
| Correct diagnosis, yes                                                                       | 170 (47.2%)      | 94 (52.2%)           | 76 (42.2%)         | 0.1280  |
| Effective therapeutic alternatives, yes                                                      | 129 (35.8%)      | 57 (31.7%)           | 72 (40.0%)         | 0.1320  |
| Easy device handling, yes                                                                    | 130 (36.1%)      | 61 (33.9%)           | 69 (38.3%)         | 0.5677  |
| Treatment adherence, yes                                                                     | 142 (39.4%)      | 75 (41.7%)           | 67 (37.2%)         | 0.6346  |
| Adequate patient follow-up, yes                                                              | 149 (41.4%)      | 73 (40.6%)           | 76 (42.2%)         | 0.7282  |
| Frequency in assessing adherence                                                             |                  |                      |                    |         |
| Never                                                                                        | 4 (1.1%)         | 0 (0.0%)             | 4 (2.2%)           | 0.1667  |
| Sometimes                                                                                    | 48 (13.3%)       | 23 (12.8%)           | 25 (13.9%)         |         |
| Frequently                                                                                   | 163 (45.3%)      | 79 (43.9%)           | 84 (46.7%)         |         |
| Always                                                                                       | 145 (40.3%)      | 78 (43.3%)           | 67 (37.2%)         |         |
| Type of patients assessed                                                                    |                  |                      |                    |         |
| All patients                                                                                 | 261 (72.5%)      | 138 (76.7%)          | 123 (68.3%)        | 0.0766  |
| Severe patients                                                                              | 46 (12.8%)       | 20 (11.1%)           | 26 (14.4%)         | 0.3435  |
| Non-compliance                                                                               | 82 (22.8%)       | 37 (20.6%)           | 45 (25.0%)         | 0.3147  |
| Instruments used to assess adherence                                                         |                  |                      |                    |         |
| Ask the patient (and/or caregiver) directly, yes                                             | 315 (87.5%)      | 161 (89.4%)          | 154 (85.6%)        | 0.2646  |
| Morisky Green Test, yes                                                                      | 46 (12.5%)       | 21 (11.7%)           | 25 (13.9%)         | 0.5277  |
| TAI questionnaire, yes                                                                       | 41 (11.4%)       | 19 (10.6%)           | 22 (12.2%)         | 0.6187  |
| MARS-A Test, yes                                                                             | 5 (1.4%)         | 3 ( 1.7%)            | 2 ( 1.1%)          | 0.6525  |
| AEPQ Test, yes                                                                               | 3 (0.8%)         | 1 ( 0.6%)            | 2 ( 1.1%)          | 0.5621  |
| Haynes–Sackett Test, yes                                                                     | 7 (1.9%)         | 2 ( 1.1%)            | 5 ( 2.8%)          | 0.2522  |
| Use clinical response, for example FeNO, yes                                                 | 116 (32.2%)      | 53 (29.4%)           | 63 (35.0%)         | 0.2594  |
| Control of therapeutic effect, yes                                                           | 230 (63.9%)      | 121 (67.2%)          | 109 (60.6%)        | 0.1879  |
| I check planned prescriptions dispensed, yes                                                 | 144 (40.0%)      | 80 (44.4%)           | 64 (35.6%)         | 0.0852  |
| None of the above, yes                                                                       | 2 (0.6%)         | 0 ( 0.0%)            | 2 ( 1.1%)          | 0.1561  |
| Interventions to promote adherence                                                           |                  |                      |                    |         |
| Simplify the treatment as far as possible, yes                                               | 286 (79.4%)      | 147 (81.7%)          | 139 (77.2%)        | 0.2968  |
| Involve the patient in the therapeutic plan, yes                                             | 284 (78.9%)      | 143 (79.4%)          | 141 (78.3%)        | 0.7962  |
| Give written information to the patient, yes                                                 | 255 (70.8%)      | 125 (69.4%)          | 130 (72.2%)        | 0.5621  |
| Involvement of family/patient environment, yes                                               | 184 (51.1%)      | 96 (53.3%)           | 88 (48.9%)         | 0.3990  |
| Use reminder methods, yes                                                                    | 52 (14.4%)       | 28 (15.6%)           | 24 (13.3%)         | 0.5487  |
| I call the patient if she/he did not turn up for the follow-up, yes                          | 25 (6.9%)        | 13 (7.2%)            | 12 (6.7%)          | 0.8358  |

| Variable                                                                                        | Total<br>(n=360) | Untrained<br>(n=180) | Trained<br>(n=180) | p value  |
|-------------------------------------------------------------------------------------------------|------------------|----------------------|--------------------|----------|
| Give self-care guideline to the patient, yes                                                    | 145 (40.3%)      | 65 (36.1%)           | 80 (44.4%)         | 0.1070   |
| Motivational interview, yes                                                                     | 85 (23.6%)       | 33 (18.3%)           | 52 (28.9%)         | 0.0184*  |
| A specific program for asthma education, yes                                                    | 56 (15.6%)       | 22 (12.2%)           | 34 (18.9%)         | 0.0810   |
| Impart health education (inhalation techniques etc.), yes                                       | 177 (49.2%)      | 79 (43.9%)           | 98 (54.4%)         | 0.0452*  |
| <b>Resources available to evaluate or promote adherence to asthma treatment</b>                 |                  |                      |                    |          |
| Available Tests in medical history, yes                                                         | 77 (21.4%)       | 38 (21.1%)           | 39 (21.7%)         | 0.8977   |
| Education provided by nurses, yes                                                               | 206 (57.2%)      | 109 (60.6%)          | 97 (53.9%)         | 0.2011   |
| Placebo devices, yes                                                                            | 273 (75.8%)      | 135 (75.0%)          | 138 (76.7%)        | 0.7119   |
| Telemedicine, yes                                                                               | 14 (3.9%)        | 2 (1.1%)             | 12 ( 6.7%)         | 0.0064** |
| Complementary explorations (FeNO, spirometry), yes                                              | 25 (69.7%)       | 123 (68.3%)          | 128 (71.1%)        | 0.5663   |
| Written information (leaflets, etc.), yes                                                       | 248 (68.9%)      | 125 (69.4%)          | 123 (68.3%)        | 0.8199   |
| Training on adherence/adhesion (in person, online, ...), yes                                    | 74 (20.6%)       | 25 (13.9%)           | 49 (27.2%)         | 0.0017** |
| <b>Factors that influence the improvement of adherence to asthma treatment (most important)</b> |                  |                      |                    |          |
| Patient understanding of their involvement in the disease, yes                                  | 339 (94.1%)      | 170 (94.4%)          | 169 (93.9%)        | 0.9696   |
| Patient understanding of the risks and benefits of treatment, yes                               | 328 (91.1%)      | 163 (90.6%)          | 165 (91.7%)        | 0.9071   |
| Patient dexterity in the correct use of their inhaler device, yes                               | 307 (85.3%)      | 155 (86.1%)          | 152 (84.4%)        | 0.5412   |
| Simple regimen, yes                                                                             | 313 (86.9%)      | 158 (87.8%)          | 155 (86.1%)        | 0.4008   |
| Patient reminder of clinical visits, yes                                                        | 154 (42.8%)      | 82 (45.6%)           | 72 (40.0%)         | 0.4798   |
| Health professional's attention, yes                                                            | 298 (82.8%)      | 146 (81.1%)          | 152 (84.4%)        | 0.6659   |
| Adequate access to medication, yes                                                              | 274 (76.1%)      | 132 (73.3%)          | 142 (78.9%)        | 0.3437   |
| Excessive treatment modifications, yes                                                          | 264 (73.3%)      | 129 (71.7%)          | 135 (75.0%)        | 0.3529   |
| Pharmacy Access, yes                                                                            | 145 (40.3%)      | 72 (40.0%)           | 73 (40.6%)         | 0.9931   |
| High cost of medication, yes                                                                    | 193 (53.6%)      | 100 (55.6%)          | 93 (51.7%)         | 0.7599   |
| Empathy between physician and patient, yes                                                      | 299 (83.1%)      | 145 (80.6%)          | 154 (85.6%)        | 0.4258   |
| Treatment with multiple devices, yes                                                            | 251 (69.7%)      | 121 (67.2%)          | 130 (72.2%)        | 0.2180   |
| Easy device use, yes                                                                            | 326 (90.6%)      | 162 (90.0%)          | 164 (91.1%)        | 0.5130   |
| Patient preference for an inhaler, yes                                                          | 283 (78.6%)      | 142 (78.9%)          | 141 (78.3%)        | 0.9169   |
| Concordance in therapeutic targets between doctor and patient, yes                              | 280 (77.8%)      | 128 (71.1%)          | 152 (84.4%)        | 0.0082** |
| <b>Areas affected by improved adherence to treatment (greatly affected)</b>                     |                  |                      |                    |          |
| Reduced need for rescue medication, yes                                                         | 308 (85.6%)      | 152 (84.4%)          | 156 (86.7%)        | 0.8248   |
| Reduction in daytime symptoms, yes                                                              | 328 (91.1%)      | 166 (92.2%)          | 162 (90.0%)        | 0.3112   |
| Reduction in nocturnal symptoms, yes                                                            | 332 (92.2%)      | 171 (95.0%)          | 161 (89.4%)        | 0.1375   |
| Reducing exacerbations, yes                                                                     | 327 (90.8%)      | 166 (92.2%)          | 161 (89.4%)        | 0.6545   |
| Improving daily activities, yes                                                                 | 337 (93.6%)      | 166 (92.2%)          | 171 (95.0%)        | 0.5314   |

| Variable                                                                               | Total<br>(n=360) | Untrained<br>(n=180) | Trained<br>(n=180) | p value  |
|----------------------------------------------------------------------------------------|------------------|----------------------|--------------------|----------|
| Improved quality of life, yes                                                          | 335 (93.1%)      | 170 (94.4%)          | 165 (91.7%)        | 0.2914   |
| Decreased direct and indirect costs, yes                                               | 188 (52.2%)      | 101 (56.1%)          | 87 (48.3%)         | 0.2762   |
| Decreased hospitalizations, yes                                                        | 296 (82.2%)      | 144 (80.0%)          | 152 (84.4%)        | 0.5279   |
| Reduction in deaths, yes                                                               | 264 (73.3%)      | 131 (72.8%)          | 133 (73.9%)        | 0.8225   |
| Increased school performance                                                           | 259 (71.9%)      | 130 (72.2%)          | 129 (71.7%)        | 0.5505   |
| Improvement in sports activities, yes                                                  | 299 (83.1%)      | 147 (81.7%)          | 152 (84.4%)        | 0.1608   |
| <b>Useful actions related to treatment regimens to improve adherence (very useful)</b> |                  |                      |                    |          |
| Easy device use, yes                                                                   | 346 (96.1%)      | 175 (97.2%)          | 171 (95.0%)        | 0.5017   |
| Reduction in the number of daily inhalations, yes                                      | 325 (90.3%)      | 166 (92.2%)          | 159 (88.3%)        | 0.2888   |
| <b>Useful actions related to resources to improve adherence (very useful)</b>          |                  |                      |                    |          |
| Have adequate tools, yes                                                               | 305 (84.7%)      | 149 (82.8%)          | 156 (86.7%)        | 0.1509   |
| Include measurement of adherence in the clinical history, yes                          | 274 (76.1%)      | 132 (73.3%)          | 142 (78.9%)        | 0.3332   |
| Nursing consultation, yes                                                              | 295 (81.9%)      | 150 (83.3%)          | 145 (80.6%)        | 0.4869   |
| More time in consultation, yes                                                         | 319 (88.6%)      | 159 (88.3%)          | 160 (88.9%)        | 0.9296   |
| Motivation, yes                                                                        | 230 (63.9%)      | 112 (62.2%)          | 118 (65.6%)        | 0.7666   |
| <b>Useful actions related to physicians to improve adherence (very useful)</b>         |                  |                      |                    |          |
| Motivational interviewing of the patient, yes                                          | 285 (79.2%)      | 138 (76.7%)          | 147 (81.7%)        | 0.4561   |
| Distance learning courses, yes                                                         | 146 (40.6%)      | 69 (38.3%)           | 77 (42.8%)         | 0.5212   |
| Printed material, yes                                                                  | 214 (59.4%)      | 105 (58.3%)          | 109 (60.6%)        | 0.8773   |
| Videos, images, yes                                                                    | 221 (61.4%)      | 96 (53.3%)           | 125 (69.4%)        | 0.0052** |
| Social media, yes                                                                      | 111 (30.8%)      | 51 (28.3%)           | 60 (33.3%)         | 0.5025   |
| <b>Useful actions related to patients to improve adherence (very useful)</b>           |                  |                      |                    |          |
| Seminars, yes                                                                          | 175 (48.6%)      | 81 (45.0%)           | 94 (52.2%)         | 0.2706   |
| Printed material, yes                                                                  | 215 (59.7%)      | 106 (58.9%)          | 109 (60.6%)        | 0.7980   |
| Videos, images, yes                                                                    | 223 (61.9%)      | 103 (57.2%)          | 120 (66.7%)        | 0.1389   |
| Social media, yes                                                                      | 139 (38.6%)      | 62 (34.4%)           | 77 (42.8%)         | 0.2115   |

Chi-square test; statistically significant \*p <0.05, \*\*p<0.01, \*\*\*p<0.001

Untrained: no previous training in adherence; Trained: previous training in adherence (distance learning courses, printed material, videos, images, social media, among others)

**S2: Questionnaire results on adherence in asthma control for participants trained in adherence versus participants trained in motivational interviewing**

| Variables                                                                                    | Total<br>(n=180) | Trained in<br>AdhE (n=90) | Trained in<br>MI (n=90) | p value  |
|----------------------------------------------------------------------------------------------|------------------|---------------------------|-------------------------|----------|
| Degree of usefulness of receiving specific training in adherence to asthma treatment         |                  |                           |                         |          |
| Very useful, yes                                                                             | 160 (88.9%)      | 77 (85.6%)                | 83 (92.2%)              | 0.4065   |
| Importance of treatment adherence compared to the other characteristics of asthma management |                  |                           |                         |          |
| Most important, yes                                                                          | 172 (95.6%)      | 87 (96.7%)                | 85 (94.4%)              | 0.5582   |
| Importance attached to the characteristics of asthma management (most important)             |                  |                           |                         |          |
| Correct diagnosis, yes                                                                       | 76 (42.2%)       | 46 (51.1%)                | 30 (33.3%)              | 0.0497*  |
| Effective therapeutic alternatives, yes                                                      | 72 (40.0%)       | 28 (31.1%)                | 44 (48.9%)              | 0.0474*  |
| Easy device handling, yes                                                                    | 69 (38.3%)       | 30 (33.3%)                | 39 (43.3%)              | 0.3855   |
| Treatment adherence, yes                                                                     | 67 (37.2%)       | 33 (36.7%)                | 34 (37.8%)              | 0.8836   |
| Adequate patient follow-up, yes                                                              | 76 (42.2%)       | 43 (47.8%)                | 33 (36.7%)              | 0.2966   |
| Frequency in assessing adherence                                                             |                  |                           |                         |          |
| Never                                                                                        | 4 (2.2%)         | 0 (0.0%)                  | 4 (4.4%)                | 0.2506   |
| Sometimes                                                                                    | 25 (13.9%)       | 13 (14.4%)                | 12 (13.3%)              |          |
| Frequently                                                                                   | 84 (46.7%)       | 43 (47.8%)                | 41 (45.6%)              |          |
| Always                                                                                       | 67 (37.2%)       | 34 (37.8%)                | 33 (36.7%)              |          |
| Type of patients assessed                                                                    |                  |                           |                         |          |
| All patients                                                                                 | 123 (68.3%)      | 62 (68.9%)                | 61 (67.8%)              | 0.8727   |
| Severe patients                                                                              | 26 (14.4%)       | 12 (13.3%)                | 14 (15.6%)              | 0.6715   |
| Non-compliance                                                                               | 45 (25.0%)       | 24 (26.7%)                | 21 (23.3%)              | 0.6056   |
| Instruments used to assess adherence                                                         |                  |                           |                         |          |
| Ask the patient (and/or caregiver) directly, yes                                             | 154 (85.6%)      | 76 (84.4%)                | 78 (86.7%)              | 0.6715   |
| Morisky Green Test, yes                                                                      | 25 (13.9%)       | 11 (12.2%)                | 14 (15.6%)              | 0.5179   |
| TAI questionnaire, yes                                                                       | 22 (12.2%)       | 10 (11.1%)                | 12 (13.3%)              | 0.6490   |
| MARS-A Test, yes                                                                             | 2 (1.1%)         | 1 (1.1%)                  | 1 (1.1%)                | 1.0000   |
| AEPQ Test, yes                                                                               | 2 (1.1%)         | 2 (2.2%)                  | 0 (0.0%)                | 0.1550   |
| Haynes–Sackett Test, yes                                                                     | 5 (2.8%)         | 2 (2.2%)                  | 3 (3.3%)                | 0.6501   |
| Use clinical response, for example FeNO, yes                                                 | 63 (35.0%)       | 30 (33.3%)                | 33 (36.7%)              | 0.6392   |
| Control of therapeutic effect, yes                                                           | 109 (60.6%)      | 53 (58.9%)                | 56 (62.2%)              | 0.6473   |
| I checked/planned prescriptions dispensed, yes                                               | 64 (35.6%)       | 36 (40.0%)                | 28 (31.1%)              | 0.2129   |
| None of the above, yes                                                                       | 2 (1.1%)         | 1 (1.1%)                  | 1 (1.1%)                | 1.0000   |
| Resources available to evaluate or promote adherence to asthma treatment                     |                  |                           |                         |          |
| Available Tests in medical history, yes                                                      | 39 (21.7%)       | 19 (21.1%)                | 20 (22.2%)              | 0.8564   |
| Education provided by nurses, yes                                                            | 97 (53.9%)       | 61 (67.8%)                | 36 (40.0%)              | 0.0002** |
| Placebo devices, yes                                                                         | 138 (76.7%)      | 68 (75.6%)                | 70 (77.8%)              | 0.7245   |
| Telemedicine, yes                                                                            | 12 (6.7%)        | 4 (4.4%)                  | 8 (8.9%)                | 0.2320   |
| Complementary explorations (FeNO, spirometry ), yes                                          | 128 (71.1%)      | 59 (65.6%)                | 69 (76.7%)              | 0.1001   |
| Written information (leaflets, etc.), yes                                                    | 123 (68.3%)      | 64 (71.1%)                | 59 (65.6%)              | 0.4230   |

| Variables                                                                                       | Total<br>(n=180) | Trained in<br>AdhE (n=90) | Trained in<br>MI (n=90) | p value   |
|-------------------------------------------------------------------------------------------------|------------------|---------------------------|-------------------------|-----------|
| Training on adherence/adhesion (in person, online, ...), yes                                    | 49 (27.2%)       | 24 (26.7%)                | 25 (27.8%)              | 0.8670    |
| <b>Interventions to promote adherence</b>                                                       |                  |                           |                         |           |
| Simplify treatment as much as possible, yes                                                     | 139 (77.2%)      | 62 (68.9%)                | 77 (85.6%)              | 0.0077**  |
| Involve the patient in the therapeutic plan, yes                                                | 141 (78.3%)      | 64 (71.1%)                | 77 (85.6%)              | 0.0187*   |
| Give written information to the patient, yes                                                    | 130 (72.2%)      | 61 (67.8%)                | 69 (76.7%)              | 0.1831    |
| Involvement of family/patient environment, yes                                                  | 88 (48.9%)       | 43 (47.8%)                | 45 (50.0%)              | 0.7655    |
| Use reminder methods, yes                                                                       | 24 (13.3%)       | 10 (11.1%)                | 14 (15.6%)              | 0.3805    |
| I call the patient if they did not turn up for follow-up, yes                                   | 12 (6.7%)        | 6 (6.7%)                  | 6 (6.7%)                | 1.0000    |
| Give self-care guideline to the patient, yes                                                    | 80 (44.4%)       | 33 (36.7%)                | 47 (52.2%)              | 0.0357*   |
| Motivational interview, yes                                                                     | 52 (28.9%)       | 14 (15.6%)                | 38 (42.2%)              | <.0001*** |
| A specific program for asthma education, yes                                                    | 34 (18.9%)       | 14 (15.6%)                | 20 (22.2%)              | 0.2532    |
| Impart health education (inhalation techniques etc.), yes                                       | 98 (54.4%)       | 45 (50.0%)                | 53 (58.9%)              | 0.2312    |
| <b>Factors that influence the improvement of adherence to asthma treatment (most important)</b> |                  |                           |                         |           |
| Patient understanding of their involvement in the disease, yes                                  | 169 (93.9%)      | 81 (90.0%)                | 88 (97.8%)              | 0.0569    |
| Patient understanding of the risks and benefits of treatment, yes                               | 165 (91.7%)      | 80 (88.9%)                | 85 (94.4%)              | 0.1751    |
| Patient dexterity in the correct use of their inhaler device, yes+++                            | 152 (84.4%)      | 75 (83.3%)                | 77 (85.6%)              | 0.9139    |
| Simple regimen, yes                                                                             | 155 (86.1%)      | 77 (85.6%)                | 78 (86.7%)              | 0.9733    |
| Patient reminder of clinical visits, yes                                                        | 72 (40.0%)       | 38 (42.2%)                | 34 (37.8%)              | 0.8310    |
| Health professional's attention, yes                                                            | 152 (84.4%)      | 76 (84.4%)                | 76 (84.4%)              | 0.8854    |
| Adequate access to medication, yes                                                              | 142 (78.9%)      | 71 (78.9%)                | 71 (78.9%)              | 1.0000    |
| Excessive treatment modifications, yes                                                          | 135 (75.0%)      | 67 (74.4%)                | 68 (75.6%)              | 0.5489    |
| Pharmacy Access, yes                                                                            | 73 (40.6%)       | 34 (37.8%)                | 39 (43.3%)              | 0.2180    |
| High cost of medication, yes                                                                    | 93 (51.7%)       | 45 (50.0%)                | 48 (53.3%)              | 0.4543    |
| Empathy between physician and patient, yes                                                      | 154 (85.6%)      | 70 (77.8%)                | 84 (93.3%)              | 0.0036**  |
| Treatment with multiple devices, yes                                                            | 130 (72.2%)      | 63 (70.0%)                | 67 (74.4%)              | 0.7921    |
| Easy device use, yes                                                                            | 164 (91.1%)      | 82 (91.1%)                | 82 (91.1%)              | 1.0000    |
| Patient preference for an inhaler, yes                                                          | 141 (78.3%)      | 65 (72.2%)                | 76 (84.4%)              | 0.1156    |
| Concordance in therapeutic targets between and patient, yes                                     | 152 (84.4%)      | 65 (72.2%)                | 87 (96.7%)              | <.0001*** |

| Variables                                                                              | Total<br>(n=180) | Trained in<br>AdhE (n=90) | Trained in<br>MI (n=90) | p value   |
|----------------------------------------------------------------------------------------|------------------|---------------------------|-------------------------|-----------|
| <b>Areas affected by improved adherence to treatment (greatly affected)</b>            |                  |                           |                         |           |
| Reduced need for rescue medication, yes                                                | 156 (86.7%)      | 82 (91.1%)                | 74 (82.2%)              | 0.1322    |
| Reduction in daytime symptoms, yes                                                     | 162 (90.0%)      | 82 (91.1%)                | 80 (88.9%)              | 0.4598    |
| Reduction in nocturnal symptoms, yes                                                   | 161 (89.4%)      | 79 (87.8%)                | 82 (91.1%)              | 0.7264    |
| Reducing exacerbations, yes                                                            | 161 (89.4%)      | 79 (87.8%)                | 82 (91.1%)              | 0.7264    |
| Improving daily activities, yes                                                        | 171 (95.0%)      | 86 (95.6%)                | 85 (94.4%)              | 0.6048    |
| Improved quality of life, yes                                                          | 165 (91.7%)      | 86 (95.6%)                | 79 (87.8%)              | 0.1212    |
| Decreased direct and indirect costs, yes                                               | 87 (48.3%)       | 51 (56.7%)                | 36 (40.0%)              | 0.0232*   |
| Decreased hospitalisations, yes                                                        | 152 (84.4%)      | 77 (85.6%)                | 75 (83.3%)              | 0.5067    |
| Reduction in deaths, yes                                                               | 133 (73.9%)      | 75 (83.3%)                | 58 (64.4%)              | 0.0062**  |
| Increased school performance, yes                                                      | 129 (71.7%)      | 63 (70.0%)                | 66 (73.3%)              | 0.8592    |
| Improvement in sports activities, yes                                                  | 152 (84.4%)      | 76 (84.4%)                | 76 (84.4%)              | 0.5954    |
| <b>Useful actions related to treatment regimens to improve adherence (very useful)</b> |                  |                           |                         |           |
| Easy device use, yes                                                                   | 171 (95.0%)      | 87 (96.7%)                | 84 (93.3%)              | 0.4601    |
| Reduction in the number of daily inhalations, yes                                      | 159 (88.3%)      | 80 (88.9%)                | 79 (87.8%)              | 0.4640    |
| <b>Useful actions related to resources to improve adherence (very useful)</b>          |                  |                           |                         |           |
| Have adequate tools, yes                                                               | 156 (86.7%)      | 79 (87.8%)                | 77 (85.6%)              | 0.3632    |
| Include adherence measurement in the clinical history, yes                             | 142 (78.9%)      | 71 (78.9%)                | 71 (78.9%)              | 1.0000    |
| Nursing consultation, yes                                                              | 145 (80.6%)      | 73 (81.1%)                | 72 (80.0%)              | 0.9017    |
| More time in consultation, yes                                                         | 160 (88.9%)      | 79 (87.8%)                | 81 (90.0%)              | 0.8117    |
| Motivation, yes                                                                        | 118 (65.6%)      | 59 (65.6%)                | 59 (65.6%)              | 0.9603    |
| <b>Useful actions related to physicians to improve adherence (very useful)</b>         |                  |                           |                         |           |
| Motivational interviewing of the patient, yes                                          | 147 (81.7%)      | 60 (66.7%)                | 87 (96.7%)              | <.0001*** |
| Distance learning courses, yes                                                         | 77 (42.8%)       | 36 (40.0%)                | 41 (45.6%)              | 0.6475    |
| Printed material, yes                                                                  | 109 (60.6%)      | 54 (60.0%)                | 55 (61.1%)              | 0.6481    |
| Videos, images, yes                                                                    | 125 (69.4%)      | 55 (61.1%)                | 70 (77.8%)              | 0.0068**  |
| Social media, yes                                                                      | 60 (33.3%)       | 26 (28.9%)                | 34 (37.8%)              | 0.4404    |
| <b>Useful actions related to patients to improve adherence (very useful)</b>           |                  |                           |                         |           |
| Seminars, yes                                                                          | 94 (52.2%)       | 49 (54.4%)                | 45 (50.0%)              | 0.4015    |
| Printed material, yes                                                                  | 109 (60.6%)      | 57 (63.3%)                | 52 (57.8%)              | 0.5663    |
| Videos, images, yes                                                                    | 120 (66.7%)      | 58 (64.4%)                | 62 (68.9%)              | 0.2476    |
| Social media, yes                                                                      | 77 (42.8%)       | 28 (31.1%)                | 49 (54.4%)              | 0.0060**  |

C: Chi-square test; statistically significant \* $p < 0.05$ , \*\* $p < 0.01$ , \*\*\* $p < 0.001$

Trained in AdhE: previous training in adherence (distance learning courses, printed material, videos, images, social media, among others)

Training in MI: Training in motivational interview: 2.30-hour-long training sessions for medical professionals including: asthma adherence evidenced based video support. The training MI was conducted by a psychiatrist specialised in the type of technique.
